# Supplementary material for: An oligogenic architecture underlying ecological and reproductive divergence in sympatric populations
Source: eLife. 2023 Feb 28;12:e82825. doi: 10.7554/eLife.82825 (PMC9977317; doi:10.7554/eLife.82825)
Supplement: Supplementary file 4. [file elife-82825-supp4.xlsx]

## Sheet: Sheet1
Name	Internal name [1]	Chromosome	Position [2]	Motif	Forward primer	Reverse primer	Size [3]	Dye	Set	Scorable [4]	Marker
MS101	MS_c1s8p86980	1	634807	AG	TCAAGACGCCAGACAAAAGA	CGCCGCTTCAAATTACTGAC	415	HEX	6	YES	C1M1
MS102	MS_c1s15p1802123	1	1467742	GAA	GGGTGCGTCACAAAAGTTTC	TGTTTGAGCTTTTCCTGTTGC	220	HEX	8	NO	-
MS103	MS_c1s29p72606	1	4419208	TC	TTGCGATTTTCTGTGGTCTG	TTGGTCTTGACTGGCTGTTG	213	HEX	7	YES	C1M2
MS104	MS_c1s59p1429135	1	5544616	TG	CGACACATATCACGGAGCAG	TCGGCAAATCTAACCATACGA	306	FAM	7	YES	C1M3
MS105	MS_c1s19p129932	1	6487528	TC	GCCCTGAAGCATTTCAAAAA	TCCTTGTAGAAAGGCGGAAA	222	HEX	6	YES	C1M4
MS106	MS_c1s27p1643687	1	8266251	AG	TTTAAGTCAATGCGGAAGAGG	GAACAAAAACCATCGCACAA	100	FAM	7	YES	C1M5
MS107	MS_c1s22Bp113007	1	8553163	TC	ACTTCGCATGTTTCCCAGAA	CCATGTCATCAACTTCCGTCT	411	HEX	7	NO	-
MS108	MS_c1s31p75178	1	14704747	AG	TGGATTGAGATGGACGTTGA	CTGTTCGAGTTCAAATGGAATG	305	FAM	6	YES	C1M6
MS109	MS_c1s17p218989	1	17462705	TG	CAAGCATGACACATCAAGCA	CACACAAACCGTATCGGTGA	124	FAM	6	YES	C1M7
MS110	MS_c1s42p265009	1	18183719	GAT	CACGACGCACCACTTAAGAA	CACAAAATCAGTCGGTGGAA	329	FAM	8	NO	-
LP1	LP_c1_20992616	1	20992616	-	TAGAGCGATCCGCGCTAATA	GATTATCTGTTCCACTTGCGATA	148/227	-	-	YES	C1M8
MS111	MS_c1s44p1006880	1	22933080	CT	CCATTTAAGGGATGCGTGAT	CAAGCGAAAGCAATTTCCAT	420	HEX	8	NO	-
LP2	LP_c1_25495114	1	25495114	-	TCAAAATGTGAAGTTTCAAAGCA	TTGGAGCATTTCTTCAATGTTT	114/156	-	-	YES	C1M9
MS112	MS_c1s61p885571	1	25862224	GA	CAAAACATCTTTTCGGGTCAC	GGGTTCTAGCAAAGCGAAGA	177	FAM	8	NO	-
Name	Internal name [1]	Chromosome	Position [2]	Motif	Forward primer	Reverse primer	Size [3]	Dye	Set	Scorable [4]	Marker
MS113	MS_c2s20p241395	2	502108	AG	TTGGCTATTTGGTTGGTCGT	TTGATGTGTTCATCGCACTG	244	HEX	2	YES	C2M1
MS114	MS_c2s13p558035	2	1242367	TC	GGGTCGCGTCATGATTCTTA	CCAAACCTGAAAATCCATCC	219	HEX	1	NO	-
MS115	MS_c2s46p12782	2	2800433	TC	TTTGGCGTTGTTCAAGTCTCT	TCGACTCAAGCTCCAAAGTG	215	HEX	3	YES	C2M2
MS116	MS_c2s56p339515	2	5674405	CAT	TGAATGTCGTGTTTGGGTTAAG	GCAGATCTACAATGAAAGGTAATGG	360	HEX	2	YES	C2M3
MS117	MS_c2s26p165497	2	8425973	TC	CCTTTTTGCCATCGTTCATT	TGTCGAGGGCATGAATATGA	149	FAM	1	YES	C2M4
MS118	MS_c2s26p3127993	2	11358786	AG	TGAAACCAAAAGTGGCACAA	TGGAAATCCAAAGTGGAAGAG	149	FAM	3	YES	C2M5
MS119	MS_c2s50p1574694	2	14667091	TC	TGCTTTGACGCTAGTAAACAGG	AAATGATGAACCGTGACTGTCT	161	FAM	2	YES	C2M6
MS120	MS_c2s47Cp5092848	2	18620830	CA	TGACCTTTTCAAGGCAAATTAAA	TCTCACGTTTTCGATGATGG	300	FAM	2	YES	C2M7
MS121	MS_c2s47Cp2334121	2	21305073	AG	GTTTCATCATTTCGCTGTTGC	TCCACAAGCTAAGATGCAATTC	306	FAM	3	NO	-
MS122	MS_c2s47Ap263174	2	24127353	TC	AACGATGAATGGCAATTTGA	ACCCACGCATTTTTGGTAAG	306	FAM	1	NO	-
MS123	MS_c2s47Dp910701	2	25271117	AC	AATTCGCTTTGACTGGTGCT	GCCATTGAGTGGCCAAATAC	445	HEX	3	YES	C2M8
MS124	MS_c2s47Fp635401	2	27069765	AG	GCAAATTCAAGGGAATCCTG	TTCCAGCAAAGTCTGTTTCG	461	HEX	1	YES	C2M9
Name	Internal name [1]	Chromosome	Position [2]	Motif	Forward primer	Reverse primer	Size [3]	Dye	Set	Scorable [4]	Marker
LP3	LP_c3_923966	3	923966	-	AAACAATGTCAATTGCCAAATA	TGAGACTGATGATAGATTATGTTCCA	126/195	-	-	YES	C3M1
MS125	MS_c3s49p1469338	3	3109346	AG	GCGATTAAATGTCGCGATAAG	CGTCAGAAGTCAAAGTGTCAGG	349	FAM	4	YES	C3M2
MS126	MS_c3s41Ap1756763	3	5995719	TAA	GTGGAAAGCTTTGGCGTAGA	TGCTTCTTGTCTTGCTCAATG	149	FAM	5	YES	C3M3
LP4	LP_c3_10859823	3	10859823	-	CGCAGCGTTTTTCAATACAA	TTTGATTTYCTGGGGTGTGA	149/228	-	-	YES	C3M4
MS127	MS_c3s48p3645480	3	12404930	CT	GCATGCAGATTCGAAAAACA	AGCGCTGGTTGAAAAAGAGA	270	HEX	4	NO	-
MS128	MS_c3s52p2174046	3	16511020	TG	CGACGACTCAGTGGTTATGC	ACTCCCACACCTTTCAATCAA	422	HEX	5	YES	C3M5
MS129	MS_c3s45Bp393746	3	18127054	AC	CGGGGCGAGTATGTTATCAA	GAATGAAGGCTGGAAAAAGTCA	151	FAM	4	YES	C3M6
MS130	MS_c3s45Ap765404	3	20771652	TG	GCACGAACGAGTTGTGAATG	GGCAGATCGAAATGTCTTTGT	301	FAM	5	YES	C3M7
MS131	MS_c3s5p69084	3	22737957	TG	TGCAATCGTACGTTGAACTCTT	TTGCAAACTGACGCAGACTC	211	HEX	5	YES	C3M8
MS132	MS_c3s3p743476	3	25467715	AC	TGGAATGGTAGCGGGTTAAA	TCGCTCGTTACAAGATGGAA	436	HEX	4	YES	C3M9
[1]	Microsatellite (MS) or length polymorphism (LP); chromosme (c), scaffold (s) and position (p) on CLUMA1.0 reference assembly for MS and on CLUMA2.0 assembly for LP
[2]	5' end of forward primer in CLUMA2.0 refernce assembly
[3]	expected amplicon size based on CLUM1.0 reference assembly
[4]	microsatellite/length polymorphism was PCR-amplifiable and segregated in a scorable pattern in Ros-FMxNM cross
