# Supplementary material for: An oligogenic architecture underlying ecological and reproductive divergence in sympatric populations
Source: eLife. 2023 Feb 28;12:e82825. doi: 10.7554/eLife.82825 (PMC9977317; doi:10.7554/eLife.82825)
Supplement: Supplementary file 6. [file elife-82825-supp6.xlsx]

## Sheet: Sheet1
FST	QTL	Gene ID	Putative gene	Chromosome	Position	SNPs													Indels
						CDS: non-synonymous	CDS: synonymous	Stop gained	Stop lost	Stop retained	Start lost	Splice site	3' UTR	5' UTR	Intron	Non coding transcript	Intergenic	Intragenic	Frameshift	Inframe (conservative)	Inframe (disruptive)	Stop gained	Stop lost	Stop retained	Start lost	Start retained	Splice site	3' UTR	5' UTR	Intron	Non coding transcript	Intergenic	Intragenic
>0.6		CLUMA_CG020013	NA	chr1	4134425	.	.	.	.	.	.	.	.	.	.	.	4	.	.	.	.	.	.	.	.	.	.	.	.	2	.	2	.
>0.6		CLUMA_CG019977	(sp)_putative_Arginine-hydroxylase_NDUFAF5%2C_mitochondrial	chr1	4135600	.	.	.	.	.	.	.	.	.	.	.	4	.	.	.	.	.	.	.	.	.	.	.	.	.	.	2	.
>0.6		CLUMA_CG019979	(nr)_putative_nuclear_pore_complex_protein_DDB_G0274915-like	chr1	4142501	.	.	.	.	.	.	.	.	.	2	.	.	.	.	.	.	.	.	.	.	.	.	.	.	.	.	.	.
>0.6		CLUMA_CG005654	(pfam)_DUF1676_domain_containing_protein_CLUMA_CG005654	chr1	4457076	.	.	.	.	.	.	.	.	.	.	.	1	.	.	.	.	.	.	.	.	.	.	.	.	.	.	1	.
>0.6		CLUMA_CG005667	(pfam)_DUF1676_domain_containing_protein_CLUMA_CG005667	chr1	4457076	.	.	.	.	.	.	.	.	.	.	.	1	.	.	.	.	.	.	.	.	.	.	.	.	.	.	1	.
>0.6		CLUMA_CG000851	(sp)_similar_to_Dynamin-1-like_protein_CLUMA_CG000851	chr1	4714034	.	.	.	.	.	.	.	.	.	.	.	.	.	.	.	.	.	.	.	.	.	.	.	.	.	.	1	.
>0.6		CLUMA_CG000853	NA	chr1	4714034	.	.	.	.	.	.	.	.	.	.	.	.	.	.	.	.	.	.	.	.	.	.	.	.	.	.	1	.
>0.6		CLUMA_CG000841	NA	chr1	4817120	.	2	.	.	.	.	.	.	.	.	.	.	.	.	.	.	.	.	.	.	.	.	.	.	.	.	.	.
>0.6		CLUMA_CG018930	(sp)_putative_5'-nucleotidase_domain-containing_protein_3	chr1	5674933	.	.	.	.	.	.	.	.	.	2	.	.	.	.	.	.	.	.	.	.	.	.	.	.	.	.	.	.
>0.6		CLUMA_CG003005	(mn)_Ionotropic_receptor_60a_(IR60a)	chr1	6300137	.	.	.	.	.	.	.	.	.	.	.	.	.	.	.	.	.	.	.	.	.	.	.	.	.	.	1	.
>0.6		CLUMA_CG003000	(sp)_similar_to_Limbic_system-associated_membrane_protein_CLUMA_CG003000	chr1	6300137	.	.	.	.	.	.	.	.	.	.	.	.	.	.	.	.	.	.	.	.	.	.	.	.	.	.	1	.
>0.6		CLUMA_CG005143	(sp)_putative_Cadherin-87A	chr1	6738725	.	.	.	.	.	.	.	.	.	1	.	.	.	.	.	.	.	.	.	.	.	.	.	.	.	.	.	.
>0.6		CLUMA_CG005226	(sp)_putative_Hormone_receptor_4	chr1	7036032	.	.	.	.	.	.	.	.	.	.	.	.	.	.	.	.	.	.	.	.	.	.	.	1	2	.	.	.
>0.6		CLUMA_CG005651	(sp)_putative_Serine_protease_3	chr1	8399023	.	.	.	.	.	.	.	.	.	.	.	1	.	.	.	.	.	.	.	.	.	.	.	.	.	.	1	.
>0.6		CLUMA_CG005612	(sp)_putative_Toll-like_receptor_7	chr1	8399023	.	.	.	.	.	.	.	.	.	.	.	1	.	.	.	.	.	.	.	.	.	.	.	.	.	.	1	.
>0.6		CLUMA_CG003833	(mn)_Ionotropic_receptor_7.x8_(IR7.x8)_pseudogene?	chr1	8526350	5	.	.	.	.	.	.	.	.	.	.	.	.	.	.	.	.	.	.	.	.	.	.	.	.	.	.	.
>0.6		CLUMA_CG003841	(sp)_putative_Ras_GTPase-activating_protein_raskol	chr1	8526350	.	.	.	.	.	.	.	.	.	25	.	.	.	.	.	.	.	.	.	.	.	.	.	.	.	.	.	.
>0.6		CLUMA_CG018849	NA	chr1	9209667	.	.	.	.	.	.	.	.	.	1	.	.	.	.	.	.	.	.	.	.	.	.	2	.	1	.	.	.
>0.6		CLUMA_CG002108	(sp)_related_to_Retinol_dehydrogenase_11	chr1	11354040	.	.	.	.	.	.	.	.	.	.	.	2	.	.	.	.	.	.	.	.	.	.	.	.	.	.	.	.
>0.6		CLUMA_CG002110	(sp)_similar_to_Glutathione_S-transferase_1-1_CLUMA_CG002110	chr1	11354040	.	.	.	.	.	.	.	.	.	.	.	2	.	.	.	.	.	.	.	.	.	.	.	.	.	.	.	.
>0.6		CLUMA_CG024385	(sp)_putative_Protein_muscleblind	chr1	12759391	.	.	.	.	.	.	.	.	.	.	.	1	.	.	.	.	.	.	.	.	.	.	.	.	.	.	.	.
>0.6		CLUMA_CG001740	NA	chr1	12759391	.	.	.	.	.	.	.	.	.	.	.	1	.	.	.	.	.	.	.	.	.	.	.	.	.	.	.	.
>0.6		CLUMA_CG002622	(sp)_putative_Coiled-coil_domain-containing_protein_lobo	chr1	13913382	.	.	.	.	.	.	.	.	.	1	.	.	.	.	.	.	.	.	.	.	.	.	.	.	.	.	1	.
>0.6		CLUMA_CG024509	NA	chr1	13913382	.	.	.	.	.	.	.	.	.	.	.	.	.	.	.	.	.	.	.	.	.	.	.	.	.	.	1	.
>0.6		CLUMA_CG002549	(sp)_related_to_3-hydroxyisobutyryl-CoA_hydrolase%2C_mitochondrial_CLUMA_CG002549	chr1	14033949	2	2	.	.	.	.	.	.	1	2	.	1	.	.	.	.	.	.	.	.	.	.	.	1	.	.	.	.
>0.6		CLUMA_CG022477	(sp)_related_to_3-hydroxyisobutyryl-CoA_hydrolase%2C_mitochondrial_CLUMA_CG022477	chr1	14035773	.	.	.	.	.	.	.	.	.	.	.	1	.	.	.	.	.	.	.	.	.	.	.	.	.	.	.	.
>0.6	QTL 1	CLUMA_CG008386	(mn)_Tachykinin-like_receptor_at_99D_(TkR99D)	chr1	15777096	3	.	.	.	.	.	.	.	.	.	.	.	.	.	.	.	.	.	.	.	.	.	.	.	.	.	.	.
>0.6	QTL 1	CLUMA_CG020610	(sp)_putative_Syntaxin-1A	chr1	16591767	.	.	.	.	.	.	.	.	.	.	.	.	.	.	.	.	.	.	.	.	.	.	.	.	5	.	.	.
>0.6	QTL 1	CLUMA_CG020824	(mn)_period_(per)	chr1	17280426	.	.	.	.	.	.	.	.	7	19	.	6	.	.	.	.	.	.	.	.	.	.	.	2	14	.	3	.
>0.6	QTL 1	CLUMA_CG002364	(mn)_pickpocket_CLUMA_CG002364	chr1	17281861	.	2	.	.	.	.	1	.	.	1	.	9	.	.	.	.	.	.	.	.	.	.	.	.	.	.	3	.
>0.6	QTL 1	CLUMA_CG002369	(sp)_similar_to_Dehydrogenase/reductase_SDR_family_member_on_chromosome_X_CLUMA_CG002369	chr1	17285502	.	3	.	.	.	.	.	.	.	.	.	3	.	.	.	.	.	.	.	.	.	.	.	.	.	.	.	.
>0.6	QTL 1	CLUMA_CG002460	NA	chr1	17676854	.	.	.	.	.	.	.	.	.	.	.	1	.	.	.	.	.	.	.	.	.	.	.	.	.	.	.	.
>0.6	QTL 1	CLUMA_CG002472	NA	chr1	17676854	1	.	.	.	.	.	.	.	.	.	.	1	.	.	.	.	.	.	.	.	.	.	.	.	.	.	.	.
>0.6	QTL 1	CLUMA_CG006144	(sp)_related_to_Protein_spitz_CLUMA_CG006144	chr1	17770917	.	.	.	.	.	.	.	.	.	1	.	.	.	.	.	.	.	.	.	.	.	.	.	.	.	.	2	.
>0.6	QTL 1	CLUMA_CG023302	(sp)_related_to_Protein_spitz_CLUMA_CG023302	chr1	17770917	.	.	.	.	.	.	.	.	.	.	.	.	.	.	.	.	.	.	.	.	.	.	.	.	.	.	2	.
>0.6	QTL 1	CLUMA_CG008012	(sp)_putative_DNA_topoisomerase_1	chr1	18087445	.	.	.	.	.	.	.	.	.	.	.	.	.	.	.	.	.	.	.	.	.	.	4	.	.	.	.	.
>0.6	QTL 1	CLUMA_CG008187	(sp)_similar_to_N-acetylgalactosaminyltransferase_4_CLUMA_CG008187	chr1	18706611	1	.	.	.	.	.	.	.	.	.	.	.	.	.	.	.	.	.	.	.	.	.	.	.	.	.	.	.
>0.6	QTL 2	CLUMA_CG020204	(sp)_putative_Nuclear_pore_complex_protein_Nup133	chr1	25510150	1	.	.	.	.	.	.	.	.	.	.	.	.	.	.	.	.	.	.	.	.	.	.	.	.	.	.	.
>0.6	QTL 2	CLUMA_CG020208	(mn)_plum | (sp)_similar_to_Brother_of_CDO	chr1	25527322	.	.	.	.	.	.	.	.	.	4	.	.	.	.	.	.	.	.	.	.	.	.	.	.	.	.	.	.
>0.4		CLUMA_CG017949	(sp)_similar_to_3-oxoacyl-[acyl-carrier-protein]_reductase_FabG_CLUMA_CG017949	chr2	7452391	.	.	.	.	.	.	.	.	.	.	.	2	.	.	.	.	.	.	.	.	.	.	.	.	.	.	1	.
>0.4		CLUMA_CG017947	NA	chr2	7452391	.	.	.	.	.	.	.	.	.	.	.	2	.	.	.	.	.	.	.	.	.	.	.	.	.	.	1	.
>0.4		CLUMA_CG017952	(sp)_putative_Sodium/bile_acid_cotransporter_5	chr2	7461980	.	2	.	.	.	.	.	.	.	.	.	.	.	.	.	.	.	.	.	.	.	.	.	.	.	.	.	.
>0.4		CLUMA_CG017953	(mn)_Gustatory_receptor_43_(GR43)	chr2	7462968	1	6	.	.	.	.	.	.	.	1	.	.	.	.	.	.	.	.	.	.	.	.	.	.	.	.	.	.
>0.4		CLUMA_CG009535	(sp)_related_to_HIV_Tat-specific_factor_1_homolog	chr2	7464868	1	1	.	.	.	.	.	.	.	2	.	4	.	.	.	.	.	.	.	.	.	.	.	.	.	.	.	.
>0.4		CLUMA_CG017954	NA	chr2	7466572	.	.	.	.	.	.	.	.	.	.	.	4	.	.	.	.	.	.	.	.	.	.	.	.	.	.	.	.
>0.4		CLUMA_CG024356	NA	chr2	7487587	.	.	.	.	.	.	.	.	.	.	.	1	.	.	.	.	.	.	.	.	.	.	.	.	.	.	.	.
>0.4		CLUMA_CG003411	NA	chr2	7487587	.	.	.	.	.	.	.	.	.	.	.	1	.	.	.	.	.	.	.	.	.	.	.	.	.	.	.	.
>0.4		CLUMA_CG004602	(sp)_similar_to_Protein_tramtrack%2C_beta_CLUMA_CG004602	chr2	9578624	2	.	.	.	.	.	.	.	.	.	.	.	.	.	.	.	.	.	.	.	.	.	.	.	.	.	.	.
>0.4		CLUMA_CG004863	(sp)_putative_cAMP-specific_3'%2C5'-cyclic_phosphodiesterase	chr2	10568233	.	.	.	.	.	.	.	.	.	.	.	.	.	.	.	.	.	.	.	.	.	.	.	.	11	.	.	.
>0.4	QTL	CLUMA_CG015068	(sp)_putative_Alpha-L-iduronidase	chr2	15853287	2	1	.	.	.	.	.	.	.	1	.	.	.	.	.	.	.	.	.	.	.	.	.	.	.	.	.	.
>0.4	QTL	CLUMA_CG015349	(sp)_putative_TBC1_domain_family_member_1	chr2	15854557	.	.	.	.	.	.	.	.	2	1	.	.	.	.	.	.	.	.	.	.	.	.	.	.	.	.	.	.
>0.4	QTL	CLUMA_CG012971	(mn)_signal_transducer_and_transcription_activator_Stat92E-like_1_(stat92El1) | Stat1-like	chr2	17316893	.	.	.	.	.	.	.	.	.	9	.	1	.	.	.	.	.	.	.	.	.	.	.	.	3	.	.	.
>0.4	QTL	CLUMA_CG022363	NA	chr2	17318296	.	1	.	.	.	.	.	.	.	.	.	1	.	.	.	.	.	.	.	.	.	.	.	.	.	.	.	.
>0.4	QTL	CLUMA_CG011298	(sp)_putative_TGF-beta_receptor_type-1	chr2	20700840	.	.	.	.	.	.	.	.	.	5	.	.	.	.	.	.	.	.	.	.	.	.	.	.	.	.	.	.
>0.4	QTL	CLUMA_CG010830	(sp)_related_to_Galactosylgalactosylxylosylprotein_3-beta-glucuronosyltransferase_P_CLUMA_CG010830	chr2	22370220	.	.	.	.	.	.	.	.	.	.	.	1	.	.	.	.	.	.	.	.	.	.	.	.	.	.	.	.
>0.4	QTL	CLUMA_CG023463	(sp)_related_to_Galactosylgalactosylxylosylprotein_3-beta-glucuronosyltransferase_P_CLUMA_CG023463	chr2	22370220	.	.	.	.	.	.	.	.	.	.	.	1	.	.	.	.	.	.	.	.	.	.	.	.	.	.	.	.
>0.4	QTL	CLUMA_CG000081	(sp)_putative_Membralin	chr3	1365270	.	.	.	.	.	.	.	.	.	2	.	.	.	.	.	.	.	.	.	.	.	.	.	.	.	.	.	.
>0.4	QTL	CLUMA_CG007484	NA	chr3	7027320	2	1	.	.	.	.	.	.	.	.	.	.	.	.	.	.	.	.	.	.	.	.	.	.	.	.	.	.
>0.4	QTL	CLUMA_CG013280	(sp)_putative_Protein_ECT2	chr3	9308367	.	.	.	.	.	.	.	.	.	.	.	.	.	.	.	.	.	.	.	.	.	.	.	.	3	.	.	.
>0.4	QTL	CLUMA_CG013356	(sp)_putative_Protein_furry	chr3	9647837	4	6	.	.	.	.	.	.	.	2	.	1	.	.	.	.	.	.	.	.	.	.	.	.	4	.	.	.
>0.4	QTL	CLUMA_CG013355	NA	chr3	9647837	.	.	.	.	.	.	.	.	.	.	.	1	.	.	.	.	.	.	.	.	.	.	.	.	.	.	.	.
>0.4	QTL	CLUMA_CG013429	(sp)_putative_Semaphorin-2A	chr3	9982618	.	.	.	.	.	.	.	.	.	.	.	.	.	.	.	.	.	.	.	.	.	.	.	.	4	.	.	.
>0.4	QTL	CLUMA_CG013443	(sp)_putative_ARF_GTPase-activating_protein_GIT2	chr3	10042796	1	.	.	.	.	.	.	.	.	.	.	.	.	.	.	.	.	.	.	.	.	.	.	.	.	.	.	.
>0.4	QTL	CLUMA_CG013513	(mn)_TRP_channel_transient_receptor_potential_cation_channel_subfamily_M_(Trpm)	chr3	10303595	.	24	.	.	.	.	.	.	.	12	.	.	.	.	.	.	.	.	.	.	.	.	.	.	.	.	.	.
>0.4	QTL	CLUMA_CG022407	(sp)_putative_Cytosolic_carboxypeptidase-like_protein_5	chr3	10362891	.	1	.	.	.	.	.	.	.	.	.	.	.	.	.	.	.	.	.	.	.	.	.	.	.	.	.	.
>0.4	QTL	CLUMA_CG013537	NA	chr3	10377569	.	.	.	.	.	.	.	.	.	.	.	2	.	.	.	.	.	.	.	.	.	.	.	.	.	.	.	.
>0.4	QTL	CLUMA_CG013538	NA	chr3	10377569	.	.	.	.	.	.	.	.	.	.	.	2	.	.	.	.	.	.	.	.	.	.	.	.	.	.	.	.
>0.4	QTL	CLUMA_CG013539	(mn)_Down_syndrome_cell_adhesion_molecule_2_(Dscam2)	chr3	10380101	.	.	.	.	.	.	.	4	.	.	.	.	.	.	.	.	.	.	.	.	.	.	.	.	.	.	.	.
>0.4	QTL	CLUMA_CG024000	(mn)_Aquaporin_big_brain_(bib)	chr3	11105680	.	.	.	.	.	.	.	.	.	1	.	.	.	.	.	.	.	.	.	.	.	.	.	.	.	.	1	.
>0.4	QTL	CLUMA_CG013720	(sp)_putative_Neuroligin-like_protein_glit-1	chr3	11105680	.	.	.	.	.	.	.	.	.	.	.	.	.	.	.	.	.	.	.	.	.	.	.	.	.	.	1	.
>0.4	QTL	CLUMA_CG013726	(sp)_similar_to_Trypsin%2C_alkaline_A_CLUMA_CG013726	chr3	11127429	1	.	.	.	.	.	.	.	.	1	.	.	.	.	.	.	.	.	.	.	.	.	.	.	1	.	.	.
>0.4	QTL	CLUMA_CG024669	(nr)_putative_protein_obstructor-E-like	chr3	11131133	.	.	.	.	.	.	.	.	.	.	.	2	.	.	.	.	.	.	.	.	.	.	.	.	.	.	.	.
>0.4	QTL	CLUMA_CG018167	(sp)_similar_to_Trypsin_beta_CLUMA_CG018167	chr3	11131133	.	.	.	.	.	.	.	.	.	.	.	2	.	.	.	.	.	.	.	.	.	.	.	.	.	.	.	.
>0.4	QTL	CLUMA_CG022604	(sp)_similar_to_Trypsin%2C_alkaline_A_CLUMA_CG022604	chr3	11136276	1	.	.	.	.	.	.	.	.	.	.	.	.	.	.	.	.	.	.	.	.	.	.	.	.	.	.	.
>0.4	QTL	CLUMA_CG013727	(sp)_similar_to_Lipase_member_H_CLUMA_CG013727	chr3	11138968	.	.	.	.	.	.	.	.	.	2	.	.	.	.	.	.	.	.	.	.	.	.	.	.	.	.	.	.
>0.4	QTL	CLUMA_CG013728	(pfam)_DUF2236_domain_containing_protein_CLUMA_CG013728	chr3	11141251	.	.	.	.	.	.	1	.	.	2	.	.	.	.	.	.	.	.	.	.	.	.	.	.	3	.	.	.
>0.4		CLUMA_CG015788	(sp)_putative_Zinc_transporter_2	chr3	13221842	.	.	.	.	.	.	.	2	.	14	.	3	.	.	.	.	.	.	.	.	.	.	.	.	6	.	1	.
>0.4		CLUMA_CG015831	NA	chr3	13221842	.	.	.	.	.	.	.	6	.	.	.	.	.	.	.	.	.	.	.	.	.	.	.	.	.	.	.	.
>0.4		CLUMA_CG015766	(sp)_similar_to_Chaoptin	chr3	13241308	.	.	.	.	.	.	.	.	1	3	.	3	.	.	.	.	.	.	.	.	.	.	.	.	1	.	1	.
>0.4		CLUMA_CG016118	(nr)_putative_mucin-5AC_CLUMA_CG016118	chr3	13287644	.	.	.	.	.	.	.	.	.	.	.	1	.	.	.	.	.	.	.	.	.	.	.	.	1	.	.	.
>0.4		CLUMA_CG015894	NA	chr3	13291314	.	.	.	.	.	.	.	.	.	.	.	1	.	.	.	.	.	.	.	.	.	.	.	.	.	.	.	.
>0.4		CLUMA_CG024579	(sp)_putative_Inositol_monophosphatase_1	chr3	14294877	.	.	.	.	.	.	.	.	.	1	.	.	.	.	.	.	.	.	.	.	.	.	.	.	.	.	.	.
>0.4		CLUMA_CG015899	(mn)_ligand-dependent_nuclear_receptor_transcription_factors_ecdysone-induced_protein_78C_(Eip78c)	chr3	14313566	.	.	.	.	.	.	.	.	.	.	.	.	.	.	.	.	.	.	.	.	.	.	.	.	10	.	.	.
>0.4		CLUMA_CG016302	(nr)_related_to_LOW_QUALITY_PROTEIN:_growth_arrest_and_DNA_damage-inducible_protein_GADD45_alpha-like_CLUMA_CG016302	chr3	15205513	.	2	.	.	.	.	.	1	.	.	.	.	.	.	.	.	.	.	.	.	.	.	.	.	.	.	.	.
>0.4		CLUMA_CG016944	(sp)_similar_to_Tryptase	chr3	15205909	.	.	.	.	.	.	.	1	.	.	.	.	.	.	.	.	.	.	.	.	.	.	.	.	.	.	.	.
>0.4		CLUMA_CG009336	NA	chr3	18084332	1	.	.	.	.	.	.	.	.	.	.	13	.	.	.	.	.	.	.	.	.	.	.	.	.	.	4	.
>0.4		CLUMA_CG009337	NA	chr3	18084693	1	.	.	.	.	.	.	3	.	.	.	13	.	.	.	.	.	.	.	.	.	.	.	.	.	.	4	.
>0.4		CLUMA_CG022126	NA	chr3	18088307	.	.	.	.	.	.	.	.	1	.	.	.	.	.	.	.	.	.	.	.	.	.	.	.	.	.	.	.
>0.4		CLUMA_CG009338	(sp)_putative_ADP-ribosylation_factor_1	chr3	18092454	.	.	.	.	.	.	.	1	.	.	.	.	.	.	.	.	.	.	.	.	.	.	.	.	.	.	.	.
>0.4		CLUMA_CG022849	NA	chr3	18300253	1	.	.	.	.	.	.	.	.	.	.	.	.	.	.	.	.	.	.	.	.	.	.	.	.	.	.	.
>0.4		CLUMA_CG009657	(sp)_related_to_Condensin_complex_subunit_2	chr3	19273849	.	1	.	.	.	.	.	.	.	.	.	.	.	.	.	.	.	.	.	.	.	.	.	.	.	.	.	.
>0.4		CLUMA_CG006228	(sp)_putative_Zinc_finger_MIZ_domain-containing_protein_1	chr3	25493088	.	.	.	.	.	.	.	.	.	.	.	.	.	.	.	.	.	.	.	.	.	.	.	.	4	.	.	.
