# Supplementary material for: An oligogenic architecture underlying ecological and reproductive divergence in sympatric populations
Source: eLife. 2023 Feb 28;12:e82825. doi: 10.7554/eLife.82825 (PMC9977317; doi:10.7554/eLife.82825)
Supplement: Supplementary file 7. [file elife-82825-supp7.csv]

pheno	sex (m-0, f-1)	ID	Set6Hex2_c1s8p86980_F	Set7Hex1_c1s29p72606	Set7Fam2_c1s59p1429135	Set6Hex1_c1s19p129932	Set7Fam1_c1s27p1643687	Set6Fam2_c1s31p75178	Set6Fam1_c1s17p218989	LP_c1_20992616	LP_c1_25495114	Set2Hex1_c2s20p241395	Set3Hex1_c2s46p12782	Set2Hex2_c2s56p339515	Set1Fam2_c2s26p165497	Set3Fam1_c2s26p3127993	Set2Fam2_c2s50p1574694	Set2Fam1_c2s47Cp5092848	Set3Hex2_c2s47Dp910701	Set1Hex2_c2s47Fp635401	LP_c3_923966	Set4Fam2_c3s49p1469338	Set5Fam1_c3s41Ap1756763	LP_c3_10859823	Set5Hex2_c3s52p2174046	Set4Fam1_c3s45Bp393746	Set5Fam2_c3s45Ap765404	Set5Hex1_c3s5p69084	Set4Hex2_c3s3p743476
			1	1	1	1	1	1	1	1	1	2	2	2	2	2	2	2	2	2	3	3	3	3	3	3	3	3	3
0	0	17x17_A_19_04_M1	AA	AA	AA	AA	AA	AA	AA	AA	AB		AB	AB	AA	AB	BB	BB	BB	BB	AB	AB	AB	AB	AB	AB	BB	BB	AB
1	1	17x17_A_21_03_F1	AA	AA		AA	AA	AA	AA					AB	AB	BB	AB	AB	AA	AB	AB	AA	AA	AA	AA	AA	AA	AB	AA
2	1	17x17_A_22_03_F1	AB		BB	BB	BB	BB	AB		BB		AB	AB	AB	AA	AA	AA	AA	AA	AA	AA	AB	AB	AB	BB	BB	BB	BB
2	1	17x17_A_22_03_F2	AA	AA	AA	AA	AA	AA	AA	AA	AA		AB	BB	BB	AB	AA	AA	AA	AA	AA	AA	AA	AB	AB		AB	AB	AB
2	0	17x17_A_22_03_M1	AB	AA	AA	AA	AA	AA	AA	AA	AB		AB	AB	AB	AB	BB	AB	AB	AB	AB	AB	AB	AA	AA	AA	AA	AB	AB
3	1	17x17_A_23_03_F1	AB	AB	AB	AB	AB	AB	AB	AA	AA		AA	AA	AB	AB	BB	AB	AB	AB	AB	AA	AA	AA	AB	AB	AB	BB	BB
3	0	17x17_A_23_03_M1	AA	AA	AA	AA	AA	AA	AA	AB	AB		AB	AB	BB	BB	BB	BB	BB	BB	AA	AA	AA	AA	AB	AB	AB	AB	AB
4	1	17x17_A_24_03_F1	AB	AB	AB	AB	AB	AB	AB	AA	AA		AB	AB	AB	AB	AB	AB	AB	BB	AB	AB	AB	AB	AA	AA	AA	AB	AB
4	1	17x17_A_24_03_F2	AA	AA	AA	AA	AB	AA	AA	AB	AB		AA	AB	BB	BB	AB	AB	AB	AB	AB	AA	AA	AB	AB	AB	AB	AB	AB
4	0	17x17_A_24_03_M1	AB	AB	AB	AB	AB	AB	AB	AB	BB		BB	BB	AB	AB	AB	AA	AA	AA	AA	AA	AA	AA	AA	AB	AB	AB	AB
5	1	17x17_A_25_03_F1	BB	AB	AB	AB	AB	BB	BB	AA	AB		AA	AA	AA	AB	AB	AB	AB	AB	BB	AB	AB	AB	AB	AB	AB	AB	AB
5	0	17x17_A_25_03_M1	AB	AA	AA	AA	AA	AB	AB	AA	AA		AB	AB	AB	BB	BB	BB	BB	BB	AA	AA	AA	AB	AB	AB	AB	AB	AB
5	0	17x17_A_25_03_M2	AB	AA	AA	AA	AA	AA	AA	AA	AA		BB	BB	BB	BB	BB	BB	BB	BB	AB	AB	AA	AA	AA	AA	AA	AA	AA
6	1	17x17_A_26_03_F1	AB	AB	AB	AB	AB	AB	AB	AA	BB		AB	BB	BB	BB	AB	AB	AB	AB	AB	AB	AB	AB	AB	AB	AA	AA	AA
6	0	17x17_A_26_03_M1	AA	AA	AB	AB	AB	AA	AA	AB	BB		AB	AB	AB	AB	AB	AB	AB	AB	AA	AA	AB	AB	AB	AB	AB	AB	BB
6	0	17x17_A_26_03_M2	AB	AB	AB	AB	AB	AB	AB	AB	BB		BB	BB	BB	AB	BB	BB	BB	BB	AB	AB	AB	AB	AB	AB	AA	AA	AA
6	0	17x17_A_26_03_M3	AB	AB	AB	AB	BB	AB	AB	AB	AB		BB	BB	BB	BB	AB	AB	AB	AB	AA	AA	AA	AA	AA	AA	AA	AA	AA
11	0	17x17_A_31_03_M1	AB	AB	AB	AB	AB	AB	AB	AB	AB		AB	AB	AB	BB	BB	BB	BB	BB	AB	AB	BB	BB	BB		BB	BB	BB
0	1	17x17_B_20_3_F1	AB	AB	AB	AB	AB	AB	AB	AA	AA	AB	AA	AA	AA	AB	AA	AA	AB	AB	AB	AB	AB	AA	AA	AA	AA	AA	AA
1	1	17x17_B_21_3_F1	AA	AA	AA	AA	AA	AA	AA	AA	AB	AB	AA	AA	AA	AB	AA	AA	AA	AA	AA	AA	AA	AA	AA	AA	AA	AA	AA
2	1	17x17_B_22_3_F1	BB	AB	AB	AB	AB	AB	AB	AA	AA	AB	AB	AB	AB	AB	AB	AB	AB	AB	AA	AA	AA	AA	AA	AA	AA	AA	AA
2	0	17x17_B_22_3_M1	AA	AA	AA	AA	AA	AA	AA	AA	AA	AA	AB	AB	AB	AB	AB	AB	AB	AB	AB	BB	AB	AB	AB	AB	AA	AA	AA
3	0	17x17_B_23_3_M1	AB	AB	AB	AB	AB	AB	AB	AA	AB	AA	AB	AB	AA	AA	AB	AB	AA	AA	AB	AB	AB	AB	AB	AB	AB	AB	AB
4	1	17x17_B_24_3_F1	AB	AB	AB	AB	AB	AB	AB	AB	AA	BB	AB	AB	AB	BB	AB	AB	AA	AA	AA	AB	AB	AB	AA	AA	AA	AA	AA
4	1	17x17_B_24_3_F3	AB	AB	AB	AB	AB	AB	AB	AB	BB	AB	AB	AB	AB	AB	AB	AB	AA	AA	AB	AB	AB	AA	AA	AA	AA	AA	AA
4	1	17x17_B_24_3_F4	AB	AA	AA	AA	AA	AA	AB	AA	AB	AA	AA	AA	AA	AA	AA	AA	AA	AA	AB	AB	AB	AB	BB	BB	AB	AB	AB
4	1	17x17_B_24_3_F5	AB	AA	AA	AA	AA	AA	AB	AA	AB	AB	AA	AA	AA	AA	AA	AA	AB	AB	BB	BB	AB	AA	AA	AA	AA	AA	AA
4	0	17x17_B_24_3_M1	BB	AA	AA	AA	AA	AA	AA	AB	AB	AB	AB	AB	AB	AB	AB	AB	AB	AB	AB	BB	BB	AB	AA	AA	AA	AA	AA
4	0	17x17_B_24_3_M2	AA	AB	AB	AB	AB	AB	AB	BB	BB	AB	AB	AB	AB	AB	AB	AA	AB	AB	AB	AB	AB	AB	AB	AB	AA	AA	AA
5	1	17x17_B_25_3_F1	AA	AB		AB	AB	AB	AA	AB	AB	AA	AA	AA	AA	AA	AA	AA	AA	AB	BB	BB	BB	BB	BB	BB	AB	BB	BB
5	1	17x17_B_25_3_F2	AA	AA	AA	AA	AA	AA	AA	AA	AA	AB	AA	AB	AB	AB	AA	AB	AB	AB	AB	AB	BB	BB	BB	BB	AB	AB	AB
5	0	17x17_B_25_3_M1	AA	AA	AA	AA	AA	AA	AA	BB	BB	AB	AB	AB	AB	AB	AB	AB	AB	AB	AB	AB	AA	AA	AA	AA	AA	AA	AA
5	0	17x17_B_25_3_M2	AB	AB	AB	AB	AB	AB	AB	AA	AB	AB	AB	AB	AB	AB	AB	AA	AA	AB	AB	AB	AB	BB	BB	BB	AB	BB	BB
6	1	17x17_B_26_3_F1	BB	AB	AB	AB	AB	AB	BB	AA	AB	AA	AA	AA	AA	AA	AA	AA	AA	AA	AB	AB	AA	AA	AA	AA	AA	AA	AA
6	1	17x17_B_26_3_F2	AB							AB	AB	AB			AB	AB	AB	AB	AB		AB		AB	AB	AA			AB
6	1	17x17_B_26_3_F3	AB	AB	AB	AB	AB	AB	AB	BB	BB	AB	AA	AA	AA	AB	AA	AA	AA	AA	BB	BB	BB	AB	AB	AB	AA	AA	AA
7	1	17x17_B_27_3_F1	AB	AB	AB	AB	AB	AB	AB	AA	BB	AA	AA	AA	AA	AA	AB	AB	AB	AB	AB	AB	AB	BB	AB	AB	AB	AA	AA
7	0	17x17_B_27_3_M1	AB	AB	AB	AB	AB	AB	AB	AB	AB	BB	AB	AB	AB	AB	AB	AB	AA	AA	AB	AB	AB	AB	AB	AB	AB	AA	AA
8	1	17x17_B_28_3_F1	AB	AB	AB	AB	AB	AB	AB	BB	BB	AB	AB	AB	AB	AB	AB	AA	AB	AB	BB	AB	AB	AB	AB	AB	AB	AB	AB
8	0	17x17_B_28_3_M1	AB	AB	AB	AB	AB	AB	AB	BB	BB	AB	AB	AB	AB	AB	AB	AB	AB	AB	AB	AB	AB	AB	AB	AB	AB	BB	BB
11	0	17x17_B_31_3_M1	AB	AB	AB	AB	AB	AB	AB	AB	AB	AB	AB	AB	AB	AB	AB	AB	AB	AB	AB		AB	AB		AB	AB	AB	AB
12	1	17x17_C_1_4_F1_032	BB	BB	BB	BB	BB	BB	BB	BB	BB	AB	AB	AB	AB	AB	AB	AB	AB	AB	AA	AA	AA	AA	AA	AA	AB	AB	AB
12	1	17x17_C_1_4_F2_031	AB	BB	BB	BB	BB	BB	BB	BB	BB	AB	AA	AA	AA	BB	AB	AB	AB	AB		AB	AB	AB	AB	AB	BB	BB	BB
12	0	17x17_C_1_4_M1_025		AA	AA		AA				AB	BB	BB	BB	BB	BB	BB	BB	BB	BB		BB	AB	AB	AB	AA	AA	AA	AA
0	1	17x17_C_20_3_F1_013	AB			AA		AB	AB	AA	AA	AA	AA	AA	AA	AA	AA	AA	AA	AA	AA	AA	AA	AA	AB	AB	AB	AB	AB
1	1	17x17_C_21_3_F1_011	AA	AA	AA	AA	AA	AA	AA	AA	AA	AB	AB	AB	AB	AB	AB	AB	AA	AA	AB	AB	AB	AB	AB	AB	AB	AB	AB
1	0	17x17_C_21_3_M1_012	AA	AA	AA	AA	AA	AA	AA	AA	AA	AB	AB	AB	AB	AB	AB	AB	AA	AA	AB	AB	AB	AB	AB	AB	BB	BB	BB
2	1	17x17_C_22_3_F1_010	AB	AB	AB	AB	AB	AB	AB	AB	AB	AA	AA	AA	AA	AA	AA	AA	AB	AB	AA	AA	AA	AB	AB	AB	AB	AB	AB
3	1	17x17_C_23_3_F1_009	AA	AA	AA	AA	AA	AA	AA	BB	BB	AB	AB	AB	AB	AB	AB	AB	AB	AB	AA	AA	AA	AA	AA	AA	BB	BB	BB
3	1	17x17_C_23_3_F2_024	AB	AA	AA	AA	AA	AB	AB	AA	AA	AA	AA	AA	AA	AA	AA	AA	AB	AB	AB	AB	AB	AB	AB	AB	AA	AB	AB
3	1	17x17_C_23_3_F3_023	AB	BB	BB	BB	BB	AB	AB	BB	BB	AA	AA	AA	AA	AA	AA	AA	AB	AB	BB	BB	AB	AB	BB	BB	BB	BB	BB
3	0	17x17_C_23_3_M2_016	AB	AB	BB	AB	AB	AB	AB			AB	AB	AB	AB	AB	AB	BB	AB	AA	AB	BB	BB	BB	BB	BB	AB	BB	BB
4	1	17x17_C_24_3_F1_020	AB			AB		AB	AB	AA	AB	AA	AA	AA	AA	AA	AA	AA	AB	AB	AB	AB	BB	AB	BB	BB	AB	AB	AB
4	1	17x17_C_24_3_F2_019	AA	AA	AA	AA	AA	AA	AA	AA	AA	BB	AB	AB	AB	BB	AB	AB	AB	AB	AB	AB	AB	AB	BB	BB	BB	BB	BB
4	1	17x17_C_24_3_F3_018	AB	AB	AB	AB	AB	AB	AB	AB	AA	AA	AA	AA	AA	AA	AA	AA	AB	AB	AB	AB	AB	AB	AB	AB	AB	BB	BB
4	1	17x17_C_24_3_F4_017	AB	BB	BB	BB	BB	BB	BB	BB	AB	AB	AA	AB	BB	AB	AA	AA	AA	AA	AA	AB	BB	BB	BB	BB	BB	BB	BB
4	1	17x17_C_24_3_F5_024	AB	AB	AB	AB	AB	AB	AB	BB	AB	AA	AB	AB	AB	AB	AB	AB	AB	AB		AB	AA		AB	AB	AB	AB	AB
4	0	17x17_C_24_3_M1_022	AB	AB	AB	AB	AB	AB	AB	AB	BB	AA	AB	AB	AB	AA	AB	AB	AB	AB	AA	AA	AA	AB	AB	AB	AB	BB	BB
4	0	17x17_C_24_3_M2_021								AA	AB	AB	AB	AB	AB	AB	AB	AB	AB	AB	AA	AA	AA	AA	AA	AB	BB	BB	BB
5	1	17x17_C_25_3_F1_023	AB	AB	AB	AB	AB	AB	AB	BB	BB	AB	AB	AB	AB	AB	AB	AB	AB	AB		AB	AA	AA	AA	AA	AA	AA	AB
5	1	17x17_C_25_3_F2_022	AB			AB		AB	AB	AB	AB	AB	AA	AB	AB	BB	AA	AA	AA	AA	AB	AB	AA	AB	AB	AB	AB	AB	AB
5	1	17x17_C_25_3_F3_021								AB	AB	AB		AB	AB		AB	AB	AB	AB	AB	AB	AB	AB			AB	AB	AB
5	1	17x17_C_25_3_F4_020	AB			AA		AA	AB	AA	AA	AB	AB	AB	AB	AB	AB	AB	AB	AA	BB	BB	AB	AB	AB	AB	AB	AB	AA
6	1	17x17_C_26_3_F1_031	AB	BB	BB	BB	BB	BB	AB	BB	AB	AA	AA	AA	AA	AA	AA	AA	AA	AA	BB	BB	BB	BB	BB	BB	BB	BB	BB
6	1	17x17_C_26_3_F2_030	AB			AB		AB	AB	AA	AB	AB	AB	AB	AB	AB	AB	AB	AB	AB	AA	AA	AA	AA	AA	AA	AA	AA	AB
6	1	17x17_C_26_3_F3_029								BB	AB	AA	AA	AA	AA	AA	AB	AB	AB	AB	BB	BB	BB	AB	AB	AB	AB	AB	AB
6	0	17x17_C_26_3_M1_019	AB			AA		AA	AB	AB	AB	AA	AB	AB	AB	AB	AB	AB	AB	AB	AB	AB	AB		AA	AA	AA	AA	AA
6	0	17x17_C_26_3_M2_018	BB	BB	AB	AB	AB	AB	AB	AB	AA	AB	AB	BB	BB	BB	BB	BB	BB	BB	AB	AB	AB	AB	AB	AB	AB	AB	AB
6	0	17x17_C_26_3_M3_017	AB	AB	AA	AB	AB	AB	AB	AA	AA	BB	BB	BB	BB	BB	AB	AB	AB	AB	BB	BB	BB	AB	AB	AA	AA	AA	AA
6	0	17x17_C_26_3_M4_032	AB	AA	AA	AA	AA	AA	AA	AB	AB	AB	AB	AB	AA	AA	AB	AB	AB	AB	AB	AB	AA	AA	AA	AA	AA	AA	AA
9	0	17x17_C_29_3_M1_028		AB	AB		AA			BB	BB	AA	AB	AB	BB	AB	BB	BB	BB	BB	AB	AB	AB	AB	AB	AA	AA	AA	AA
10	1	17x17_C_30_3_F1_027		AB	AB		BB			BB	BB	AA	AB	AB	AB	AB	AB	AB	BB	BB	AB	AB	AB	AB	AB	AB	AB	AB	AB
11	0	17x17_C_31_3_M1_026	AB	BB	AB	AB	AB	AB	AB	AB	BB	AB	BB	BB	AA	AA	AB	AB	AB	AB	AB	AB	AB	AB	AB	AB	AB	AB	AB
12	0	17x17_D_1_4_M1_035	AB		AB	AB	AB	AB	AB	AA	AA	AA	AB	AB	AB	AA	BB	BB	BB	BB		BB	BB	BB	BB	BB	BB	BB	BB
0	1	17x17_D_20_3_F1_029	AB		AB	AB	AB	AB	AB	AA	AA	AA	AA	AA	AA	AA	AA	AA	AA	AA	AA	AA	AB	AB	BB	BB	BB	BB	BB
0	0	17x17_D_20_3_M1_030								AA	AB	AB	AB	AB	AB	AB	AB	AA	AA	AA	AA	AA	AA	AB	AB	AB	AB	AB	AB
3	0	17x17_D_23_3_M1_028								AB	AB	BB	BB	AB	AB	AB	AB	AB	AB	AB	AB	AB	AB	AB	AB	AB	AB	AB	AB
3	0	17x17_D_23_3_M2_027	AB		AB	AB	AB		AB		AA	AB	AB	AB	BB	BB	BB	BB	BB	BB	AA	AA	AA	AA	AA	AA	AB	AB	AB
4	1	17x17_D_24_3_F1_007	AB				AB					AB			AB	AB	AB	AB	AB	AB		AB	AB		AA			AB	AB
5	1	17x17_D_25_3_F1_025	BB		BB	BB	BB	BB	BB		AA	AB	AB	AB	AA	AA	AA	AB	AA	AA	AB	AB	BB	BB	BB	BB	BB	BB	AB
5	1	17x17_D_25_3_F2_040	AB		AB	AB	AB	AB	AB	AA	BB	AA	AA	AA	AB	AB	AB	AB	AB	AB	AA	AA	AA	AA	AA	AA	AA	AA	AA
5	1	17x17_D_25_3_F3_039	AA		AB	AB	AB	AB	AB		BB	AB	AB	AA	AA	AA	AA	AA	AA	AA	AA	AB	AB	AB	AA	AB	AB	AB	AB
5	0	17x17_D_25_3_M1_026	BB		BB		BB	BB	BB			BB	BB	BB	BB	BB	BB	BB	BB	BB	AB	AB	AB	AB	AB	AB	AB	AB	AB
7	0	17x17_D_27_3_M1_038	BB		BB	BB	BB	BB	BB	BB	AB	AB	AB	AB	AB	AB	AB	AA	AA	AA	AB	AB	AB	AB	AB	BB	BB	BB	BB
8	0	17x17_D_28_3_M1_037	AA		AB	AB	AB	AB	AB		AB	BB	BB	BB	AB	AB	AB	AB	AB	AB		BB	BB	BB	BB	BB	AB	AB	AB
9	0	17x17_D_29_3_M1_036	AB		AB	AB	AB	AB	AB		AB	AB	BB	AB	AB	AB	AB	AB	AB	AB	AB	AB	AB	AB	BB	BB	BB	BB	BB
9	0	17x17_D_29_3_M2_035	AA		AB	AB	AB	AB	AB		BB	AB	BB	BB	BB	AB	BB	BB	BB	BB	AB	AB	AB	BB	BB	BB	BB	BB	BB
9	0	17x17_D_29_3_M3_034	AA		AB	AB	AB	AB	AB	AB	BB	BB	BB	BB	BB	BB	BB	BB	BB	BB	AB	AB	AB	AB	AB	AB	BB	BB	BB
10	0	17x17_D_30_3_M1_033	BB		BB	BB	BB	BB	BB		AA	AA	AB	AA	AA	AA	AB	AB	AB	AB		BB	BB	BB	BB	BB	BB	BB	BB
10	0	17x17_D_30_3_M2_040	BB		BB	BB	BB	BB	BB		AB	BB	BB	BB	AB	AB	AB	AB	AB	AB		BB	BB	BB	AB	AB	AB	AB	AB
11	0	17x17_D_31_3_M1_039	BB		BB	BB	BB	BB	BB		AB	AA	AB	AB	AB	AA	BB	BB	BB	BB	AB	AB	AB	BB	BB	BB	AB	AB	AB
11	0	17x17_D_31_3_M2_038	BB		BB	BB	BB	BB	BB	AB	BB	AA	AB	AB	AB	AB	BB	BB	BB	BB	AB	AB	AA	AB	AB	AB	BB	BB	BB
11	0	17x17_D_31_3_M3_037	BB		BB	BB	BB	BB	BB	AB	BB	AB	BB	BB	BB	AB	BB	BB	BB	BB	AA	AB	BB	BB	BB	BB	BB	BB	BB
11	0	17x17_D_31_3_M4_036	BB		BB		BB	BB	BB	AB	AB	AA	AB	AA	AA	AA	AB	AB	AB	AB		BB	BB	AB	AB	AB	AA	AA	AA
12	0	17x17_E_01_04_M1	AB		AB	AB	AB	AB	AB		AB		BB	BB	BB	BB	BB	BB	BB	BB	AB	AB	AB	AB	AB	AB	AB	AB	AB
1	1	17x17_E_21_03_F1	AB		AB	AB	AB	AB	AB		AA		AA	AA	AA	AA	AA	AA	AA	AB	BB	AB	AB	AB	AB	AB	AB	AB	AB
1	1	17x17_E_21_03_F2	BB		AB	AB	AB	AB	AB		AA		AA	AA	AB	AB	AA	AA	AA	AA	AB	AB	AB	AB	AB	AB	AB	AB	AB
1	1	17x17_E_21_03_F3	AB		AB	AB	AB	AB	AB		AB		AA	AA	AA	AA	AA	AA	AA	AA	AB	AB	AB	AB	AB	AB	BB		BB
1	0	17x17_E_21_03_M1	AA		AA	AA	AA	AA	AA		AA		AB	AB	AB	AB	AB	AB	AB	AB	AB	AB	AB	AB	AB	AB	AA	AA	AA
2	1	17x17_E_22_03_F1	BB			BB	BB	BB			AB		AB	AB	AA	AA	AA	AA		AA	AB	AB	AB	AB	AA		AA
2	1	17x17_E_22_03_F2	AA		AA	AB	AB	AA	AA		AB		AA	AB	AB	BB	AB	AB	AB	AB	AA	AA	AA	AA	AA	AB	AB		BB
2	1	17x17_E_22_03_F3	AB		AB	AB	AB	AB	AA		AB		AA	AA	AA	AA	AA	AB	AB	AB	AA	AA	AB	AB	AB	AB	AB	AB	AB
2	0	17x17_E_22_03_M1	AB		BB	BB	BB	BB	BB		AB		AB	AB	AB	AA	AB	AB	AB	AB	AA	AA	AA	AA	AA	AB	AA		AA
3	1	17x17_E_23_03_F1	AB		BB	BB	BB	BB	BB		AB		AA	AA	AA	AA	AA	AA	AA	AA	AB	AB	AB	AB	AB	AB	AB		AB
3	1	17x17_E_23_03_F2	AB		AB	AB	AB	AB	AA		AA		AB	AB	BB	AB	AA	AA	AA	AA	AA	AA	AB	AB	AB	AB	AB	AB	AB
3	1	17x17_E_23_03_F3	AA		AB	AB	AB	AB	AA		AB		AB	BB	BB	BB	AB	AA	AA	AA	AA	AA	AA	AA	AA	AA	AA		AA
3	1	17x17_E_23_03_F4	AA		AB	AB	AB	AB	AB		AB		AA	AA	AA		AA		AA	AB	AB	AB	AB	AB	AB	AB	AB	AB	AB
3	0	17x17_E_23_03_M1	BB		BB	BB	BB	AB			AB		BB	BB	BB	AB	AB	AB	AB	AB	AA	AB	AB	AB	AB	AB	AB	AB	AB
4	1	17x17_E_24_03_F1	BB		BB	BB	BB	BB	BB		AB		BB	BB	AB	AB	BB	BB	BB	BB	AB	AB	AB	AB	AB	AB	AB	AB	AB
4	1	17x17_E_24_03_F2	BB		BB	BB	BB	BB	BB		BB		AB	AA	AA	AA	AA	AA	AA	AA	AB	BB	AB	AB	AB		BB	BB	BB
4	1	17x17_E_24_03_F3	BB		AB	AB	AB	BB	BB		AB		AB	AB	AA	AA	AA	AA	AA	AA	BB	BB	BB	BB	BB	BB	BB	AB	AB
4	0	17x17_E_24_03_M1	AB		BB		BB	BB	BB		AB		BB	BB			AB			AB	AA	AB	AB	AB	AB	AB	AB	AB	AB
4	0	17x17_E_24_03_M2	AB		AB	AB	AB	AB	AB		AB		AA	AA	AA	AA	AB	AB	AB	AB	BB	BB	AB	AB	AB	AB	AB	AB	AB
5	1	17x17_E_25_03_F1	BB		BB	BB	BB	BB	BB		AB		AB	AB	AB	AB	AA	AA	AA	AA	BB	BB	BB	BB	BB	BB	BB		BB
6	0	17x17_E_26_03_M1	AA		AA	AA	AA	AA	AA		BB		BB	BB	BB	BB	BB	AB	AB	AB	AB	AB	AB	AB	AB	AB	AB		AB
6	0	17x17_E_26_03_M2	AB		AB	AB	AB	AB	AB		AA		BB	BB	AB	AB	AB		AB	AB	BB	BB	BB	BB	BB	AB	AB	AB	AB
7	0	17x17_E_27_03_M1	BB		BB	BB	BB	BB	BB		BB		AB	AB		AB	BB	BB	BB	BB	AB	AB	AB	BB	BB	BB	BB	BB	BB
8	0	17x17_E_28_03_M1	AB		AB	AB	AB	AB	AB		BB		BB	BB	BB	AB	AB	AB	AB	AB	AB	AB	AB	AB	AB	AB	AB	AB	AB
10	1	17x17_E_30_03_F1	BB		BB	BB	BB	BB	BB		BB		AA	AA	AA	AB	AB	AB	AB	AB	BB	BB	BB	BB	BB	BB	BB	BB	BB
4	1	17x17_F_24_3_F2_034	AA	AA	AA	AA	AA	AA	AA	AA	AB	BB	AB	AB	AB	AB	AB	AB	AB	AB		BB	BB	AB	AB	AB	AB	AB	AB
4	1	17x17_F_24_3_F3_033	BB	AB	AB	AB	AB	AB	BB	AB	AA	AB	AB	AB	AB	AB	AB	AB	AA	AA	BB	BB	BB	AB	AB	AB	AB	AB	AB
4	1	17x17_F_24_3_F4_048	BB	AB	AB	AB	AB	BB	BB	AB	AB	AA	AA	AA	AA	AA	AA	AA	AB	AB	BB	BB	BB	AB	AB	AB	AB	AB	AB
5	1	17x17_F_25_3_F1_047	AB	AB	AB	AB	AB	AB	AB	AB	AB	BB	AB	AB	BB	BB	AB	AB	AA	AA		BB	AB	AB	AB	AB	AB	AB	AB
6	1	17x17_F_26_3_F1_045	AB	AB	AB	AB	AB	AB	AB	AB	AA	AB	AB	AB	AB	AB	AB	AB	AB	AB	BB	BB	BB	BB	BB	BB	BB	BB	BB
6	0	17x17_F_26_3_M1_046	AB	AA	AA	AA	AA	AB	AB	AA	AA	AB	AB	AB	AB	AB	AB	AB	AB	AB		BB	BB	BB	BB	BB	BB	BB	BB
7	1	17x17_F_27_3_F1_a_042	AB	AA	AA	AA	AA	AA	AB	AA	AB	AB	AA	AB	AB	AB	AB	AB	AB	AB	AB	AB	BB	BB	BB	BB	BB	BB	BB
7	0	17x17_F_27_3_M1_044		AB	AB		AB			BB	BB		AB	AB	AB	AB	AB	AB	AB	AB	AB	AB	AB	AB
7	0	17x17_F_27_3_M2_043	AB	AA	AA	AA	AA	AA	AA	AA	AB	AB	AB	AB	AB	AB	AB	AB	AB		AB	AB	AB	AB	AB	AB	AB	AB	AB
8	1	17x17_F_28_3_F1_041	AB	AB	AB		AB	AB	AB	AB	BB	BB	AB	AB	BB	BB	AB	AB	AB	AB	AA	AB	AB	AB	BB	BB	BB	BB	BB
10	1	17x17_F_30_3_F1_048	AB	AB	AB	AB	AB	AB	AB	AB	BB	AB	AB	AB	AB	AB	AB	AB	AB	AB	BB	BB	BB	AB	AB	AB	AB	AB	AB
-1	1	17x17_F_19_03_F1	AA	AA	AA	AA	AA	AA	AA	AA	AA	AB	AB	AB	AB	AB	AB	AB	AB	AB	AA	AA	AA	AA	AA	AB	AA		AA
2	1	17x17_F_22_03_F1	AB	AA	AA	AA	AA	AA	AA	AA	AA	AA	AA	AA	AA	AB	AA	AA	AA	AA	BB	BB	BB	BB	BB	BB	BB		AB
3	1	17x17_F_23_03_F1	AB	AB	AB	AB	AB	BB	BB	AB	AA	AA	AA	AA	AA	AA	AA	AA	AA	AB	BB	BB	BB	BB	AB		AB		AB
12	0	17x17_mix_01_04_M1	AA	AB	AB	AB	AB	AA	AB		AB	AA	BB	AB	AB	AB	BB	BB	BB	BB	BB	BB	BB	BB	BB		AB		AB
12	0	17x17_mix_01_04_M2	BB	BB	BB	BB	AB	BB	BB		AB	AB	BB	BB	BB	AB	BB	BB	BB	AB	AB	AB	AB	AB	BB	BB	BB		BB
0	0	17x17_mix_20_03_M1	AA	AA	AA	AA	AA	AA	AA	AA	AB	AA	AB	AB	AB	AB	AB	AB	AB	AB	AA	AA	AA	AA	AA	AA	AA	BB	BB
2	1	17x17_mix_22_03_F1	AB	AB	AB	AB	AB	AB	AB	AA	AB	AB	AA	AA	AA	AA	AA	AA	AB	AB	AA	AA	AA	AA	AA	AA	AA		AA
2	1	17x17_mix_22_03_F2	AA	AA	AB	AB	AB	AA	AA	AB	AB	AB	AB	AB	AB	AB	AB	AB	AB	AB	AB	AB	AB	AB	AB	AB	BB		BB
2	1	17x17_mix_22_03_F3	AA	AA	AA	AA	AA	AA	AA	AA	AA		AB	BB	BB	BB	AB	AB	AB	AB	AA	AA	AA	AA	AA	AA	AA		AA
2	1	17x17_mix_22_03_F4	AA	BB	BB	BB	BB	AB	AA	BB	BB	AA	AA	AA	AA	AA	AA	AA	AB	AB	BB	AB	AB	AB	AB	AB	AB	AB	AB
2	1	17x17_mix_22_03_F5	BB	AB	AB	AB	AB	AB	AB	AA	AB	AB	AA	AA	AA	AA	AA	AA	AB	AB	AB	AB	AB	AB	AB	AB	BB	BB	BB
2	0	17x17_mix_22_03_M1	AB	AA	AA	AA	AA	AA	AA	AA	AB	BB	AB	AB	AB	AB	AB	AA	AA	AA	AB	AB	AB	AB	AB	AB	AB	AA	AB
4	1	17x17_mix_24_03_F1	AA	AB	AB	AB	AB	AA	AA	AA	AB	AA	AA	AA	BB	BB	AB	AB	AB	AB		AB	AB	BB	BB		BB	BB	BB
4	1	17x17_mix_24_03_F2	BB	AB	AB	AB	AB	AB	AB	AB	AB	AA	AA	AA	AB	BB	AB	AA	AA	AA	AB	AA	AA	AA	AA	AA	AA	AB	AB
4	1	17x17_mix_24_03_F3	AB	AB	AB	AB	AB	AB	AB	AB	BB	BB	AB	AB	AB	AB	AB	AA	AA	AA	AB	AB	AB	AA	AA	AB	AA	AA	AA
4	0	17x17_mix_24_03_M1	AB	AB	AB	AB	AB	AB	AB	AA	AB	AA	AB	AB	AB	AB	BB	BB	BB	BB	AB	AB	AB	AB	AB	AB	BB	BB	AB
4	0	17x17_mix_24_03_M2	AB	AB	AB	AB	AB	AB	AB	AB	AA	AA	AB	AA	AA	AA	AB	AB	AB	AB	AB	AB	AB	AB	AA	AA	AA	AA	AA
5	1	17x17_mix_25_03_F1	AB	AB	AB	AB	AB	AB	AB	AA	AB	AA	AB	AB	AB	AB	AB	AB	AB	AB	AB	AB	AB	AB	AB	AB	AB		AB
5	1	17x17_mix_25_03_F2	AA	AA	AA	AA	AA	AA	AA	AA		AA	AA	AA	AA	AB	AA	AA	AB	AB	BB	AB	AB	AB	AA		AA		AA
5	0	17x17_mix_25_03_M1	BB	BB	BB	BB	BB	BB	BB	AB	AB	AB	AB	AB	AA	AA	AB	AB	AB	AB	BB	AB	AB	AB	AB	AB	AB		AA
5	0	17x17_mix_25_03_M2	BB	BB	BB	AB	AB	BB	BB	AA	AA	AB	AB	AB	AB	AB	AB	AB	AB	AB	AB	AB	AB	AB	AB	AB	AA		AA
6	1	17x17_mix_26_03_F1	AB	AB	AB	AB	AB	AB	AB	AB	BB		AA	AA	AB	AB	AA	AB	AB	AB	AB	AB	AB	AB	AB	AB	AA		AB
6	0	17x17_mix_26_03_M1	AA	AA	AA	AA	AA	AA	AA	AA	AB	AB	BB	BB	BB	AB	BB	BB	AB	AB	AB	AB	AB	AA	AA	AA	AA		AB
7	1	17x17_mix_27_03_F1	BB	AB	AB	AB	AB	AB	AB	AA	AB	AB	AB	AB	BB	BB	AB	AB	AB	AB	AB	AB	AB	AB	AB	AB	BB		BB
7	0	17x17_mix_27_03_M1	AB	AB	AB	AB	AB	AB	AB	BB	AB	AB	AB	AB	AB	BB	BB	BB	BB	BB	AA	AB	AB	BB	BB		BB		BB
8	1	17x17_mix_28_03_F1	AB	BB	BB	BB	BB	BB	AB	BB		AB	AA	AA	AB	AB	AA	AA	AA	AB	BB	BB	BB	BB	BB	AB	AB		AB
8	0	17x17_mix_28_03_M1	AA	AB	AB	AB	BB	AB	AB	AA		AA	AB	AB	AB	AB	AB	AB	AB	AB	AB	AB	AB	BB	BB		BB		BB
9	0	17x17_mix_29_03_M1	AB	AB	AB	AB	AB	AB	AB		AB	AB	BB	BB	AB	AA	AB	AB	AB	AB	BB	BB	BB	AB	AB	AB	AB		AB
