# Supplementary figures and images for: An oligogenic architecture underlying ecological and reproductive divergence in sympatric populations
Source: eLife journal article supplement (doi:10.7554/elife.82825), 2023-02-08

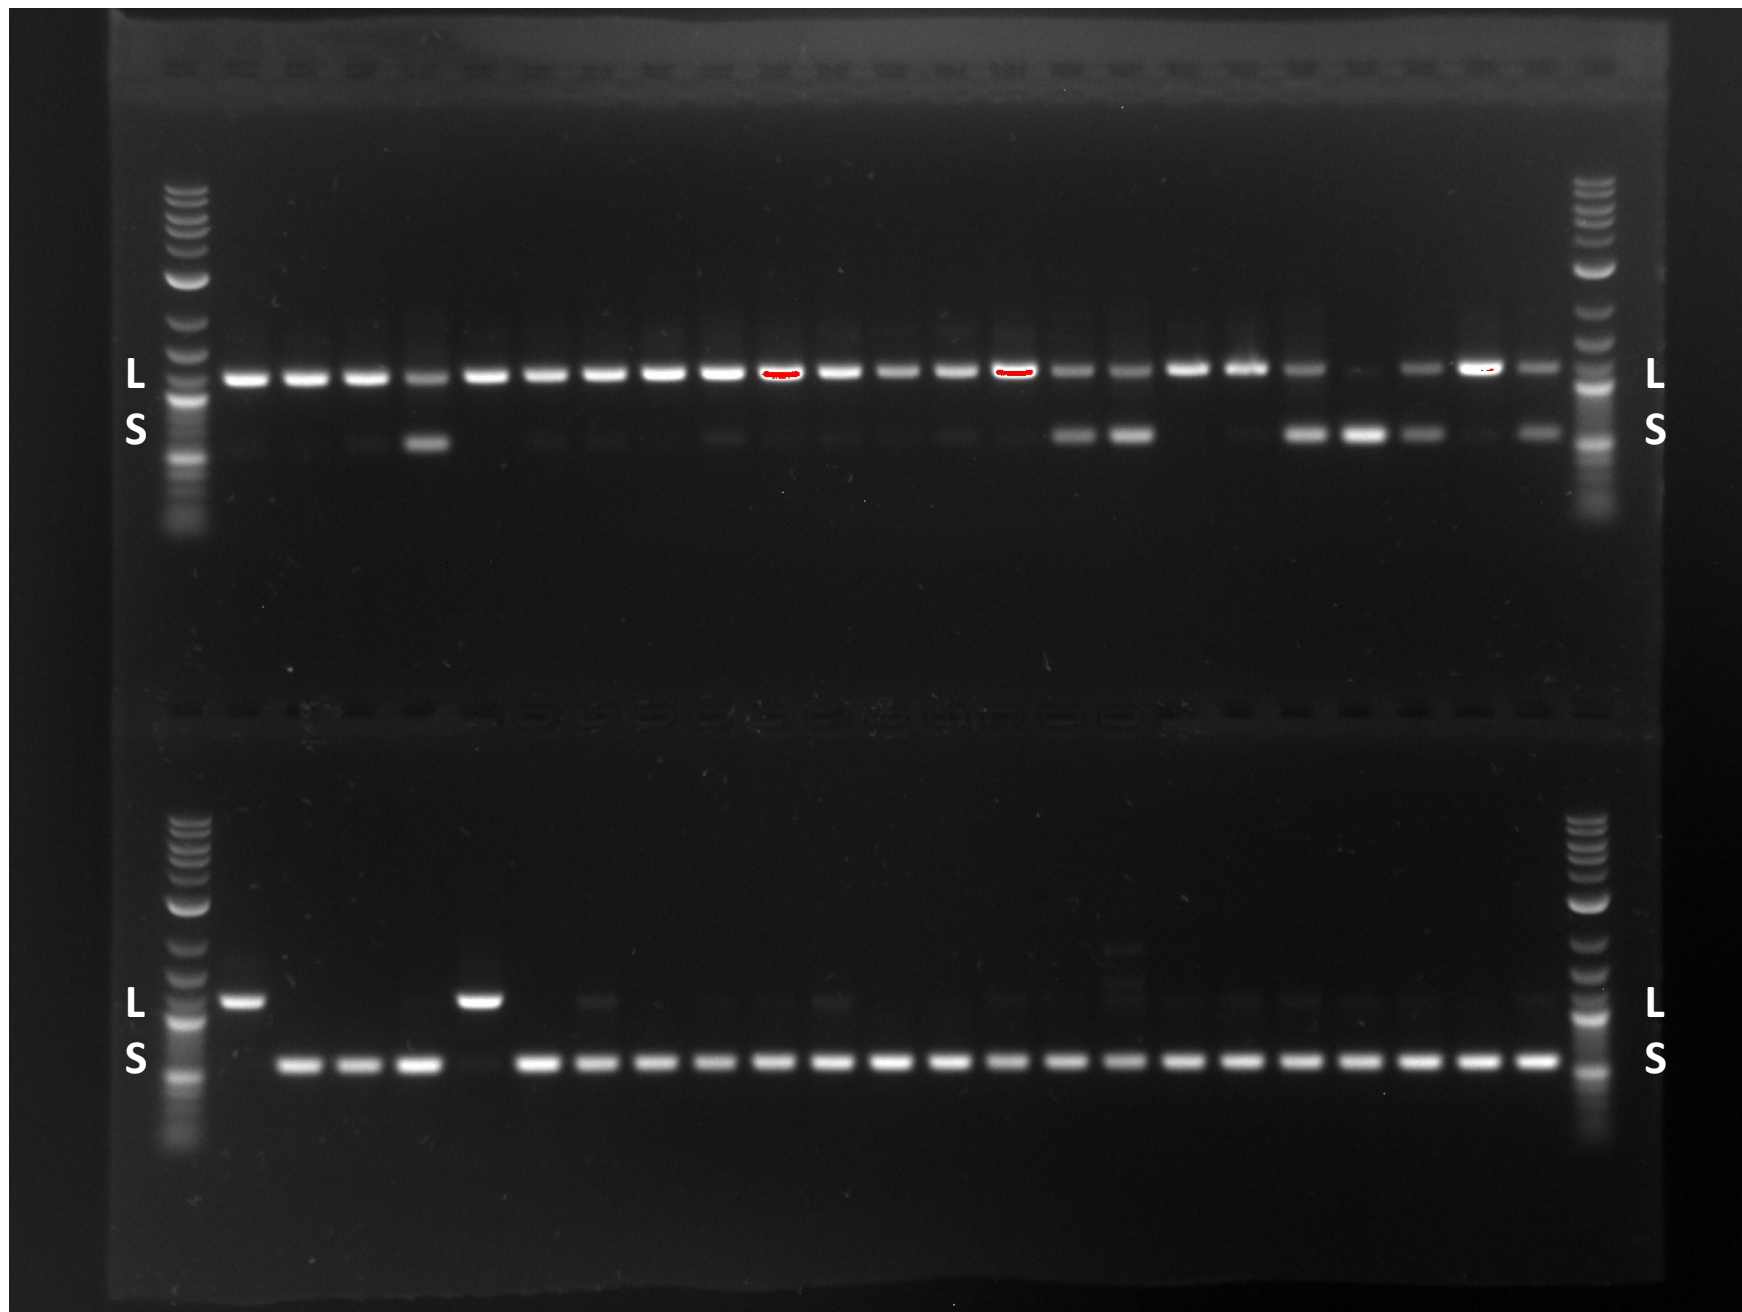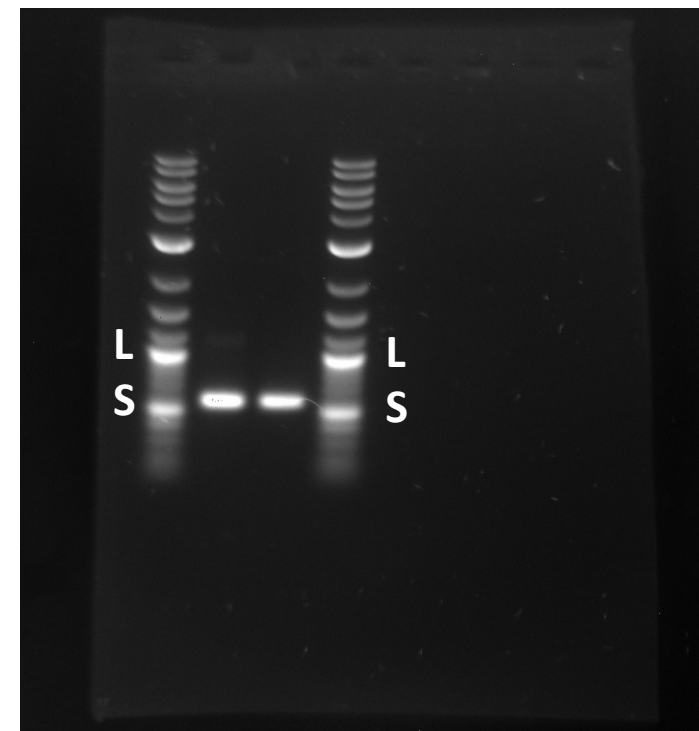

Supplement: fig5-figsupp4-data1 [file elife-82825-fig5-figsupp4-data1-v2.zip]
